# Supplementary material
Source: Elsevier journal article supplement (https://www.sciencedirect.com/science/article/pii/S0210569119300336)
Supplement: mmc1 [file S0210569119300336:mmc1.pdf]

## Material Suplementario

### Programa de Seguimiento al Alta de Terapia Intensiva

A continuación se describirán las herramientas recomendadas para la evaluación de los dominios en el programa de seguimiento.

#### 1. Score de Fragilidad Clínica

El estado funcional y el estado crónico de enfermedad son factores que pueden definir la evolución de un paciente crítico. La evaluación de la fragilidad en la admisión de la Unidad de Cuidados Intensivos (UCI) puede aportar información pronóstica objetiva para mejorar la interpretación de la situación clínica del paciente y además tener una comunicación realista con la familia y el paciente. La fragilidad es frecuente en los pacientes ingresados en una UCI y se asocia con peor evolución. La identificación de esta población previamente no detectada debería ser un objetivo fundamental de todo el equipo de cuidados críticos. Para ello se han desarrollado herramientas que facilitan su detección. Una de ellas es el Score de Fragilidad Clínica CSHA (*Clinical Frailty Scale, del Canadian Study of Health and Aging*<sup>1</sup>). Es una escala con un excelente desempeño y que se asocia con cada incremento de 1 categoría con un aumento significativo del riesgo de muerte (21.2% dentro de los 70 meses aproximadamente) o derivación a un centro de tercer nivel (23,9%)<sup>2</sup>. Es una escala de aplicación muy sencilla.

**Costo:** no tiene costo, de uso libre.

### Score de Fragilidad Clinica (CSHA)

1. **Muy en forma:** robusto, activo, energético, muy motivado y en forma; estas personas habitualmente se ejercitan regularmente y son los que mejor estado físico tienen para su grupo etario.
2. **Bien:** sin ninguna enfermedad activa, pero con un peor estado funcional que las personas en la categoría 1.
3. **Bien, con alguna enfermedad activa en tratamiento:** los síntomas de la enfermedad están bien controlados en comparación con aquellos en la categoría 4.
4. **Aparentemente vulnerable:** aunque no es totalmente dependiente, estas personas generalmente se quejan de sentirse "lentos" o tienen síntomas de la enfermedad.
5. **Fragilidad leve:** con dependencia limitada para las actividades instrumentales de la vida diaria.
6. **Fragilidad moderada:** necesita ayuda tanto para actividades instrumentales como no instrumentales de la vida diaria.
7. **Fragilidad grave:** completamente dependiente de otros para las actividades de la vida diaria o con enfermedad terminal.

Nota: CSHA (Canadian Study of Health and Aging)

Traducción y adaptación: Dr. Federico Carini (CSyR / SATI / 2018)

A global clinical measure of fitness and frailty in elderly people  
Kenneth Rockwood, Xiaowei Song, Chris MacKnight, Howard Bergman, David B. Hogan, Ian McDowell, Arnold Mitnitski  
CMAJ Aug 2005; 173 (5) 489-495; DOI: 10.1503/cmaj.050051

## 2. Test de caminata de 6 minutos

El propósito de la prueba de marcha de seis minutos (TC6M<sup>3</sup>) es medir la distancia máxima que un individuo puede recorrer durante un período de seis minutos caminando tan rápido como le sea posible. De acuerdo con la velocidad a la cual camina una persona, se determinarán los metros recorridos. La TC6M se lleva a cabo en un corredor con longitud de 30 metros, de superficie plana, preferentemente en interiores y evitando el tránsito de personas ajenas a la prueba. La TC6M evalúa, de manera integrada, la respuesta de los sistemas respiratorio, cardiovascular, metabólico, musculoesquelético y neurosensorial que el individuo desarrolla durante el ejercicio. Esta prueba suele considerarse como una prueba submáxima de ejercicio; sin embargo, algunas personas pueden alcanzar su máxima capacidad para ejercitarse. Ha mostrado ser de utilidad clínica para la clasificación, seguimiento y pronóstico de los pacientes portadores de diversas enfermedades respiratorias. Además, la prueba permite medir el efecto de intervenciones farmacológicas, quirúrgicas o de rehabilitación sobre la capacidad física y el estado funcional de los pacientes<sup>4</sup>. El cambio mínimo clínicamente significativo en sujetos con enfermedades respiratorias crónicas (enfermedad pulmonar obstructiva crónica<sup>5</sup>, hipertensión pulmonar, enfermedades intersticiales) es de 25 a 33 metros con una mediana de 30 metros. Existen ciertas contraindicaciones para la TC6M como patologías cardíacas o coronarias recientes (3-5 días) o no controladas o incapacidad de comprender la prueba. El equipo y material necesario para la TC6M es

- Escala de Borg impresa en tamaño de letra de 20 puntos, útil en pacientes con limitaciones visuales.

- Hoja de recolección de datos.

- Cronómetro, estetoscopio y contador de vueltas.

- Silla (puede ser más de una) o silla de ruedas.

- Oxímetro de pulso. En las recomendaciones actuales de 2014 se incluye como requisito a la oximetría debido a la importancia de la información clínica que aporta.

- Desfibrilador automático y carro de paro con nitroglicerina sublingual y salbutamol (inhalador de dosis medida o nebulizador).

- Acceso a una fuente de oxígeno.

**Costo:** no tiene costo, de uso libre.

### 3. Índice de Katz

El Índice de Katz (IK) evalúa funciones básicas como baño, vestido, uso del retrete, movilidad, continencia y alimentación, categorizando cada nivel en dependencia leve, moderada y severa<sup>6</sup>. Se considera a una persona dependiente leve, aquel que no precisa ayuda o utiliza ayuda solo para un componente de la actividad, dependiente moderado aquella persona que requiere de asistencia para más de un componente, pero puede realizar otros componentes de la actividad sin ayuda o supervisión, y dependiente severo aquella persona que necesita ayuda de otra persona, incluyendo la supervisión o guía para todos los componentes de la actividad. Niveles que posteriormente se clasifican en dos: dependencia o independencia<sup>7</sup>. Sobre la base de esta última categorización, las personas son incluidas en uno de los 8 niveles de dependencia del índice, que oscilan entre:

- A. Independiente en alimentación, continencia, movilidad, uso del retrete, vestirse y bañarse.
- B. Independiente para todas las funciones anteriores, excepto una.
- C. Independiente para todas, excepto bañarse y otra función adicional.
- D. Independiente para todas, excepto bañarse, vestirse y otra función adicional.
- E. Independiente para todas, excepto bañarse, vestirse, uso del retrete y otra función adicional.
- F. Independiente para todas, excepto bañarse, vestirse, uso del retrete y otra función adicional.
- G. Dependiente en las seis funciones.
- O. Dependiente en al menos dos funciones, pero no clasificable como C, D, E o F.

A (máxima independencia) – G (máxima dependencia)

Finalmente, el resultado se informa utilizando la letra adecuada en cada caso, por ejemplo: Índice de Katz: C.

Es un índice con buena validez interna. Es un buen predictor de mortalidad a corto y largo plazo, de la necesidad de institucionalización, del tiempo de estancia en pacientes hospitalizados y de la eficacia de los tratamientos. También ha demostrado ser un predictor eficaz de expectativa de vida activa (a mayor puntuación menor expectativa de vida activa). Su fiabilidad ha sido valorada en múltiples estudios presentando coeficientes de correlación ( $>0.70$ ) y test-retest ( $>0.90$ ) altos, siendo mayor en los pacientes menos deteriorados<sup>8</sup>. Está validado en varios idiomas, países, entornos culturales y niveles socioeconómicos. Incluso algunos autores lo han utilizado para validar sus propias escalas.

La capacidad del índice de Katz para valorar tareas dependientes de las extremidades superiores es limitada y presenta poca sensibilidad al cambio. En general es muy eficaz en la valoración de pacientes con altos grados de dependencia, pero su eficacia disminuye en pacientes más sanos en los que se subestima la necesidad de ayuda.

Por último, la capacidad funcional valorada por el índice es independiente de la severidad de las enfermedades que sufre el paciente y del dolor percibido en su realización.

**Costo:** no tiene costo, de uso libre.

| Índice de Katz                                                                         |                                                                                                                                                                                                                                                                                                                                                                                                                          |
|----------------------------------------------------------------------------------------|--------------------------------------------------------------------------------------------------------------------------------------------------------------------------------------------------------------------------------------------------------------------------------------------------------------------------------------------------------------------------------------------------------------------------|
| LAVADO                                                                                 | <input checked="" type="checkbox"/> No recibe ayuda (entra y sale solo de la bañera si esta es la forma habitual de bañarse)<br><input checked="" type="checkbox"/> Recibe ayuda en la limpieza de una sola parte de su cuerpo (espalda o piernas por ejemplo)<br><input type="checkbox"/> Recibe ayuda en el aseo de más de una parte de su cuerpo para entrar o salir de la bañera                                     |
| VESTIDO                                                                                | <input checked="" type="checkbox"/> Toma la ropa y se viste completamente sin ayuda<br><input checked="" type="checkbox"/> Se viste sin ayuda excepto para atarse los zapatos<br><input type="checkbox"/> Recibe ayuda para coger la ropa y ponérsela o permanece parcialmente vestido                                                                                                                                   |
| USO DE RETRETE                                                                         | <input checked="" type="checkbox"/> Va al retrete, se limpia y se ajusta la ropa sin ayuda puede usar bastón, andador y silla de ruedas)<br><input type="checkbox"/> Recibe ayuda para ir al retrete, limpiarse, ajustarse la ropa o en el uso nocturno del orinal<br><input type="checkbox"/> No va al retrete                                                                                                          |
| MOVILIZACIÓN                                                                           | <input checked="" type="checkbox"/> Entra y sale de la cama, se sienta y se levanta sin ayuda (puede usar bastón o andador)<br><input type="checkbox"/> Entra y sale de la cama, se sienta y se levanta con ayuda<br><input type="checkbox"/> No se levanta de la cama                                                                                                                                                   |
| CONTINENCIA                                                                            | <input checked="" type="checkbox"/> Control completo de ambos esfínteres<br><input type="checkbox"/> Incontinencia ocasional<br><input type="checkbox"/> Necesita supervisión. Usa sonda vesical o es incontinente                                                                                                                                                                                                       |
| ALIMENTACION                                                                           | <input checked="" type="checkbox"/> Sin ayuda<br><input checked="" type="checkbox"/> Ayuda solo para cortar la carne o untar el pan<br><input type="checkbox"/> Necesita ayuda para comer o es alimentado parcial o completamente usando sondas o fluidos intravenosos                                                                                                                                                   |
| <input checked="" type="checkbox"/> INDEPENDIENTE <input type="checkbox"/> DEPENDIENTE |                                                                                                                                                                                                                                                                                                                                                                                                                          |
| VALORACIÓN                                                                             | A Independiente en todas las funciones<br>B Independiente en todas salvo en una de ellas<br>C Independiente en todas salvo lavado y otra más<br>D Independiente en todas salvo lavado, vestido y otra más<br>E Independiente en todas salvo lavado, vestido, uso de retrete y otra más<br>F Independiente en todas salvo lavado, vestido, uso de retrete, movilización y otra más<br>G Dependiente en las seis funciones |

#### 4. Test Timed Up and Go

El test Get up and go (*TUG*) fue diseñado como una herramienta de screening para detectar problemas de equilibrio en la población, en la que el sujeto debía levantarse de una silla con reposa brazos, caminar tres metros, girar sobre sí mismo, retroceder los tres metros y volver a sentarse. Para obviar su subjetividad, Podsiadlo<sup>9</sup> desarrolló el test Timed Up and Go, en el que el sujeto realiza las mismas tareas que el Get up and go, mientras el examinador cronometra el tiempo que precisa para realizar la prueba. Se clasifica de la siguiente manera

≤ 10 segundos = normal, movilidad independiente

≤ 20 segundos = mayormente independiente, puede salir solo, móvil sin ayuda a la marcha

≤ 30 segundos = movilidad reducida, no puede salir solo, requiere ayuda para caminar

Se ha demostrado una puntuación de ≥14 segundos para indicar un alto riesgo de caídas<sup>10</sup>. Los adultos sin enfermedad neurológica que son independientes en tareas de equilibrio y movilidad habitualmente son capaces de realizar este test en menos de 10 segundos. Sin embargo, los adultos que necesitan más de 13,5 segundos para completarlo tienen un riesgo elevado de sufrir caídas. Para otros autores, que definen este test como la herramienta de mayor uso en clínica para identificar a la población mayor con riesgo de caídas<sup>11</sup>, un tiempo de realización mayor de 9 segundos es indicativo de mayor riesgo de caídas. Asimismo, el TUG es un test con resultados altamente replicables (coeficiente de correlación intergrupo de 0,87/0,99) siempre que se le deje al paciente hacer un primer intento de prueba. La metodología seguida a la hora de la realización y valoración del TUG fue la siguiente:

1. Paciente cómodamente sentado en una silla de 44-47 cm de altura y con apoyabrazos.
2. Indicación verbal de iniciar la prueba que consiste en levantarse y caminar en línea recta a lo largo de 3 metros. Esta distancia está marcada en el suelo y se le indicará verbalmente cuando llegue a ella. Ahí el sujeto debe girar, volver en la dirección antes recorrida y sentarse nuevamente.

La prueba se ensaya 1 ó 2 veces hasta que la sistemática queda clara para el paciente. A continuación, se realiza la prueba definitiva y se analiza. Se hace dos veces, siendo el sentido de giro una vez hacia derecha y la otra hacia izquierda.

**Costo:** no tiene costo, de uso libre.

## 5. Hospital Anxiety and Depression Scale (HADS)

La versión inicial de **HADS** consta de 24 ítems y data de 1960 siendo revisada y modificada por el mismo autor en 1967 reduciéndola a 21 ítems<sup>12</sup>; de éstos los cuatro últimos no son útiles a efectos de valorar la gravedad o intensidad de la depresión, por lo que en la práctica, se ha utilizado una versión reducida de 17 ítems. La Escala Modificada de Hamilton para la evaluación de la depresión (MHRSD), se desarrolló para superar las limitaciones que los autores encontraban en la versión de 17 ítems de la escala de Hamilton (Miller, Bishop, Norman y Maddever, 1985). Existen dos versiones adaptadas al español (Conde, 1984<sup>13</sup> y Ramos-Brieva y Cordero, 1986<sup>14</sup>) Adaptación Española: Conde en 1984, adaptó la versión de 22 ítems. Posteriormente Ramos – Brieva y Cordero (1988<sup>15</sup>) adaptaron y validaron la versión reducida de 17 ítems.

Es una escala (de observación) heteroaplicada. Ofrece una medida cuantitativa de la intensidad del trastorno depresivo. Los criterios de puntuación de los ítems dependen del juicio clínico del entrevistador quien asigna el grado de severidad de acuerdo a lo valorado en la entrevista. El marco temporal de la evaluación se refiere al momento actual y/o los días o semana previa. Su contenido se centra fundamentalmente en los aspectos somáticos y comportamentales de la depresión, siendo los síntomas vegetativos, cognitivos y de ansiedad los que más peso tienen en el cómputo total de la escala. Se han identificado distintos factores o índices, de los que los más usados son: Índice de melancolía, formado por los ítem 1 (estado de ánimo depresivo), 2 (sensación de culpabilidad), 7 (trabajo y actividades), 8 (inhibición), 10 (ansiedad psíquica) y 13 (síntomas somáticos generales); Índice de ansiedad, formado por los ítem 9 (agitación), 10 (ansiedad psíquica) y 11 (ansiedad somática); Índice de alteraciones del sueño, formado por los tres ítem referidos a insomnio (4,5,6).

Cada ítem se valora de 0 a 2 puntos en unos casos y de 0 a 4 en otros, eligiendo la puntuación que mejor se ajuste a la sintomatología que presenta el paciente. Puntuaciones más altas indican mayor gravedad del síntoma. La puntuación total es la suma de las puntuaciones asignadas a cada ítem. En la versión de 21 ítems el criterio más extendido es tomar en consideración a efectos de score sólo los primeros 17 ítems. El rango de puntuación para ambas versiones es de 0-52 puntos. Como criterio de inclusión en ensayos clínicos se suele aceptar los puntos de corte >13 o >18, según el estudio. A efectos de categorizar la intensidad o severidad del trastorno depresivo: 0-6 sin depresión; 7-17 depresión ligera; 18-24 depresión moderada; 25-52 depresión grave. Para el índice de melancolía, que cuantifica los ítem más directamente relacionados con la alteración del estado de ánimo: 0-3 no depresión; 4-8 depresión menor; >9 depresión

mayor. El índice de ansiedad/somatización se considera alto a partir de una puntuación >7.

En sus dos versiones (adaptadas) esta escala posee una buena consistencia interna (alfa de Cronbach entre 0,76 y 0,92). El coeficiente de correlación intraclase es de 0,92. La fiabilidad interobservador oscila, según autores, entre 0,65 y 0,9 Validez: Su correlación con otros instrumentos de valoración de la depresión como la Escala de Depresión de Montgomery- Asberg, o el Inventario de Sintomatología Depresiva y la Escala de Melancolía de Bech, oscila entre 0,8 y 0,9. La validez es menor en pacientes de edad elevada, aunque ha mostrado buenos índices psicométricos en subpoblaciones de especiales características y mantiene un buen rendimiento en población geriátrica. Es muy sensible al cambio terapéutico.

**Costo:** tiene costo.

|                                                                                                                                                                                                                                                                                                                                                                                                                              |                                  |
|------------------------------------------------------------------------------------------------------------------------------------------------------------------------------------------------------------------------------------------------------------------------------------------------------------------------------------------------------------------------------------------------------------------------------|----------------------------------|
|                                                                                                                                                                                                                                                                                                                                                                                                                              |                                  |
| <p><b>Ansiedad psíquica</b></p> <ul style="list-style-type: none"> <li>- No hay dificultad</li> <li>- Tensión subjetiva e irritabilidad</li> <li>- Preocupación por pequeñas cosas</li> <li>- Actitud aprensiva en la expresión o en el habla</li> <li>- Expresa sus temores sin que le pregunten</li> </ul>                                                                                                                 | <p>0<br/>1<br/>2<br/>3<br/>4</p> |
| <p><b>Ansiedad somática (signos físicos de ansiedad: gastrointestinales: sequedad de boca, diarrea, eructos, indigestión, etc; cardiovasculares: palpitaciones, cefaleas; respiratorios: hiperventilación, suspiros; frecuencia de micción incrementada; transpiración)</b></p> <ul style="list-style-type: none"> <li>- Ausente</li> <li>- Ligera</li> <li>- Moderada</li> <li>- Severa</li> <li>- Incapacitante</li> </ul> | <p>0<br/>1<br/>2<br/>3<br/>4</p> |
| <p><b>Síntomas somáticos gastrointestinales</b></p> <ul style="list-style-type: none"> <li>- Ninguno</li> <li>- Pérdida del apetito pero come sin necesidad de que lo estimulen. Sensación de pesadez en el abdomen</li> <li>- Dificultad en comer si no se le insiste. Solicita laxantes o medicación intestinal para sus síntomas gastrointestinales</li> </ul>                                                            | <p>0<br/>1<br/>2<br/>3<br/>4</p> |
| <p><b>Síntomas somáticos generales</b></p> <ul style="list-style-type: none"> <li>- Ninguno</li> <li>- Pesadez en las extremidades, espalda o cabeza. Dorsalgias. Cefaleas, algias musculares. Pérdida de energía y fatigabilidad. Cualquier síntoma bien definido se clasifica en 2</li> </ul>                                                                                                                              | <p>0<br/>1<br/>2</p>             |
| <p><b>Síntomas genitales (tales como: disminución de la libido y trastornos menstruales)</b></p> <ul style="list-style-type: none"> <li>- Ausente</li> <li>- Débil</li> <li>- Grave</li> </ul>                                                                                                                                                                                                                               | <p>0<br/>1<br/>2</p>             |
| <p><b>Hipocondría</b></p> <ul style="list-style-type: none"> <li>- Ausente</li> <li>- Preocupado de si mismo (corporalmente)</li> <li>- Preocupado por su salud</li> <li>- Se lamenta constantemente, solicita ayuda</li> </ul>                                                                                                                                                                                              | <p>0<br/>1<br/>2<br/>3</p>       |
| <p><b>Pérdida de peso</b></p> <ul style="list-style-type: none"> <li>- Pérdida de peso inferior a 500 gr. en una semana</li> <li>- Pérdida de más de 500 gr. en una semana</li> <li>- Pérdida de más de 1 Kg. en una semana</li> </ul>                                                                                                                                                                                       | <p>0<br/>1<br/>2</p>             |
| <p><b>Introspección (insight)</b></p> <ul style="list-style-type: none"> <li>- Se da cuenta que esta deprimido y enfermo</li> <li>- Se da cuenta de su enfermedad pero atribuye la causa a la mala alimentación, clima, exceso de trabajo, virus, necesidad de descanso, etc.</li> <li>- No se da cuenta que está enfermo</li> </ul>                                                                                         | <p>0<br/>1<br/>2<br/>3</p>       |

## 6. Inventario de Depresión de Beck-II (BDI-II)

El **BDI-II** es un autoinforme que proporciona una medida de la presencia y de la severidad de síntomas depresivos en adultos y adolescentes de 13 años o más. Se compone de 21 ítems indicativos de síntomas tales como tristeza, llanto, pérdida de placer, sentimientos de fracaso y de culpa, pensamientos o deseos de suicidio, pesimismo, etc. Estos síntomas se corresponden con los criterios para el diagnóstico de los trastornos depresivos recogidos en el Manual diagnóstico y estadístico de los trastornos mentales, cuarta edición, American Psychiatric Association, 1994 (DSM-IV) y el de Clasificación Estadística Internacional de Enfermedades y Problemas relacionados con la Salud, Organización Mundial de la Salud, 1993 (CIE-10). En concreto, se incluyen todos los criterios propuestos en las dos referencias citadas.

Para el diagnóstico de un episodio depresivo mayor y casi todos los propuestos para el diagnóstico de distimia (en concreto, todos los del DSM-IV y el 75% del CIE-10).

El BDI-II se puede aplicar de forma individual o colectiva, con formato de papel y lápiz o de forma oral. En general, requiere entre 5 y 10 minutos para ser completado; aunque los pacientes con depresión grave o trastornos obsesivos a menudo pueden tardar más tiempo en cumplimentarlo. Las instrucciones para el BDI-II solicitan a las personas evaluadas que elijan las afirmaciones más características que cubren el marco temporal de las últimas dos semanas, incluido el día de hoy, para ser consistente con los criterios del DSM-IV para la depresión mayor. Cada ítem se responde en una escala de 4 puntos, de 0 a 3, excepto los ítems 16 (cambios en el patrón de sueño) y 18 (cambios en el apetito) que contienen 7 categorías. Si una persona ha elegido varias categorías de respuesta en un ítem, se toma la categoría a la que corresponde la puntuación más alta. Las puntuaciones mínima y máxima en el test son 0 y 63. Se han establecido puntos de corte que permiten clasificar a los evaluados en uno de los siguientes cuatro grupos: 0-13, mínima depresión; 14-19, depresión leve; 20-28, depresión moderada; y 29-63, depresión grave.

Los datos sobre la confiabilidad de las puntuaciones se basan exclusivamente en la consistencia interna. Los coeficientes son elevados (superiores a 0.85) y similares a los obtenidos en los estudios internacionales con la versión original del BDI-II.

Existe una adaptación argentina realizada por Brenlla, M. E., & Rodríguez, C. M. en 2006<sup>16</sup>.

**Costo:** no tiene costo, de uso libre.

## 7. Inventario de Ansiedad de Beck (BAI)

El **BAI** es una escala que mide de manera autoinformada el grado de ansiedad. Está especialmente diseñada para medir los síntomas de la ansiedad menos compartidos con los de la depresión; en particular, los relativos a los trastornos de angustia o pánico y ansiedad generalizada, de acuerdo con los criterios sintomáticos que se describen en el DSM-III-R para su diagnóstico. Por ejemplo, uno de los ítems es Nerviosismo y se pide a la persona que conteste sobre la gravedad con que le afectó durante la última semana, en una escala de 4 puntos desde Nada en absoluto hasta Gravemente. El BAI ha sido formulado para que discrimine entre los grupos de diagnóstico ansioso y no ansioso en una gran variedad de poblaciones clínicas, lo que amplía sus áreas de aplicación.

Puede aplicarse a personas pertenecientes a poblaciones clínicas, y también a la población general, adultas y adolescentes (de 13 años de edad o más). Los datos que se aportan para la adaptación española corresponden a personas de 17 años o más, mayoritariamente pertenecientes a familias con algún miembro universitario. En el Manual se indica que no es apropiada su aplicación a personas con dificultades intelectuales o lingüísticas.

Cada ítem se valora de 0 a 3 puntos en función de la respuesta dada por la persona evaluada y, tras sumar directamente la puntuación de cada ítem, se obtiene una puntuación total cuyo rango es de 0 a 63. En la primera edición del manual original del BAI, se proponen los siguientes puntos de corte para delimitar distintos niveles de gravedad de la sintomatología ansiosa (Beck y Steer, 1990): 0-9 = ansiedad normal; 10-18 = ansiedad leve; 19-29 = ansiedad moderada, y 30-63 = ansiedad grave. Posteriormente, en la segunda edición del manual original del BAI, Beck y Steer (1993) proponen puntos de corte algo más bajos para definir las distintas categorías de gravedad de la ansiedad: 0-7 = normal; 8-15 = leve; 16-25 = moderada; y 26-63 = grave. A partir de los estudios de la adaptación española de Sanz y Navarro<sup>17</sup>, se ha propuesto, de manera tentativa para el contexto español, una puntuación igual o menor de 11 en el BAI (que representa la media de la población)<sup>18,19</sup>.

**Costo:** no tiene costo, de uso libre.

|                                                                                                                                                                                 |                                               |                        |                       |                       |                       |
|---------------------------------------------------------------------------------------------------------------------------------------------------------------------------------|-----------------------------------------------|------------------------|-----------------------|-----------------------|-----------------------|
| En el cuestionario hay una lista de síntomas comunes de la ansiedad. Lea cada uno de los ítems atentamente, e indique cuanto le ha afectado en la última semana incluyendo hoy: |                                               |                        |                       |                       |                       |
| <b>Inventario de Ansiedad de Beck (BAI)</b>                                                                                                                                     |                                               |                        |                       |                       |                       |
|                                                                                                                                                                                 |                                               | <b>En<br/>absoluto</b> | <b>Levemente</b>      | <b>Moderadamente</b>  | <b>Severamente</b>    |
| 1                                                                                                                                                                               | Torpe o entumecido.                           | <input type="radio"/>  | <input type="radio"/> | <input type="radio"/> | <input type="radio"/> |
| 2                                                                                                                                                                               | Acalorado.                                    | <input type="radio"/>  | <input type="radio"/> | <input type="radio"/> | <input type="radio"/> |
| 3                                                                                                                                                                               | Con temblor en las piernas.                   | <input type="radio"/>  | <input type="radio"/> | <input type="radio"/> | <input type="radio"/> |
| 4                                                                                                                                                                               | Incapaz de relajarse                          | <input type="radio"/>  | <input type="radio"/> | <input type="radio"/> | <input type="radio"/> |
| 5                                                                                                                                                                               | Con temor a que ocurra lo peor.               | <input type="radio"/>  | <input type="radio"/> | <input type="radio"/> | <input type="radio"/> |
| 6                                                                                                                                                                               | Mareado, o que se le va la cabeza.            | <input type="radio"/>  | <input type="radio"/> | <input type="radio"/> | <input type="radio"/> |
| 7                                                                                                                                                                               | Con latidos del corazón fuertes y acelerados. | <input type="radio"/>  | <input type="radio"/> | <input type="radio"/> | <input type="radio"/> |
| 8                                                                                                                                                                               | Inestable.                                    | <input type="radio"/>  | <input type="radio"/> | <input type="radio"/> | <input type="radio"/> |
| 9                                                                                                                                                                               | Atemorizado o asustado.                       | <input type="radio"/>  | <input type="radio"/> | <input type="radio"/> | <input type="radio"/> |
| 10                                                                                                                                                                              | Nervioso.                                     | <input type="radio"/>  | <input type="radio"/> | <input type="radio"/> | <input type="radio"/> |
|                                                                                                                                                                                 |                                               | <b>En<br/>absoluto</b> | <b>Levemente</b>      | <b>Moderadamente</b>  | <b>Severamente</b>    |
| 11                                                                                                                                                                              | Con sensación de bloqueo.                     | <input type="radio"/>  | <input type="radio"/> | <input type="radio"/> | <input type="radio"/> |
| 12                                                                                                                                                                              | Con temblores en las manos.                   | <input type="radio"/>  | <input type="radio"/> | <input type="radio"/> | <input type="radio"/> |
| 13                                                                                                                                                                              | Inquieto, inseguro.                           | <input type="radio"/>  | <input type="radio"/> | <input type="radio"/> | <input type="radio"/> |
| 14                                                                                                                                                                              | Con miedo a perder el control.                | <input type="radio"/>  | <input type="radio"/> | <input type="radio"/> | <input type="radio"/> |
| 15                                                                                                                                                                              | Con sensación de ahogo.                       | <input type="radio"/>  | <input type="radio"/> | <input type="radio"/> | <input type="radio"/> |
| 16                                                                                                                                                                              | Con temor a morir.                            | <input type="radio"/>  | <input type="radio"/> | <input type="radio"/> | <input type="radio"/> |
| 17                                                                                                                                                                              | Con miedo.                                    | <input type="radio"/>  | <input type="radio"/> | <input type="radio"/> | <input type="radio"/> |
| 18                                                                                                                                                                              | Con problemas digestivos.                     | <input type="radio"/>  | <input type="radio"/> | <input type="radio"/> | <input type="radio"/> |
| 19                                                                                                                                                                              | Con desvanecimientos.                         | <input type="radio"/>  | <input type="radio"/> | <input type="radio"/> | <input type="radio"/> |
| 20                                                                                                                                                                              | Con rubor facial.                             | <input type="radio"/>  | <input type="radio"/> | <input type="radio"/> | <input type="radio"/> |
|                                                                                                                                                                                 |                                               | <b>En<br/>absoluto</b> | <b>Levemente</b>      | <b>Moderadamente</b>  | <b>Severamente</b>    |
| 21                                                                                                                                                                              | Con sudores, frios o calientes.               | <input type="radio"/>  | <input type="radio"/> | <input type="radio"/> | <input type="radio"/> |

## 8. Escala de Impacto del Evento Revisada (IES-R)

Existen diferentes instrumentos para la evaluación del síndrome de estrés postraumático (SEPT), dentro de las cuales se encuentra la Escala de impacto del Evento (EIE) y la Escala de Impacto del Evento Revisada (EIE-R). La EIE fue creada en 1979<sup>20</sup>, para medir el grado del impacto subjetivo experimentado luego de un evento vital, denominado estrés subjetivo. Esta escala está compuesta por 15 ítems y dos subescalas que evalúan 2 de los 3 componentes de SEPT: pensamientos intrusivos y evitación. En el año 1997 Weiss y Marmar<sup>21</sup> realizaron una adaptación del instrumento a partir de inclusión de criterios diagnósticos del DSM-IV, incorporando 7 nuevos ítems, evaluando el tercer componente: el estado de hiperalerta. En esta nueva versión los pacientes deben identificar el evento traumático y responder los 22 ítems recordando su percepción durante la última semana. Cada ítem se puntúa de 0 (nada) a 4 (Extremo), dando una puntuación total mínima de 0 y máxima de 88 puntos. Además, se pueden calcular subescalas para los ítems que evalúan intrusión, evitación y estado hiperalerta: intrusión: ítems 1, 2, 3, 6, 9, 14, 16, 20; evitación: ítems 5, 7, 8, 11, 12, 13, 17, 22; hiperalerta: ítems 4, 10, 15, 18, 19, 21. No se aconseja su uso para diagnóstico de SEPT, sin embargo se especifican puntos de corte que sugieren una entrevista especializada<sup>22</sup>: un puntaje  $\geq 24$  indica un problema clínico; un puntaje  $\geq 33$  indica un probable diagnóstico de SEPT; un puntaje  $\geq 37$  indica un problema grave. Se encuentra adaptada y validada en español<sup>23</sup>.

### Anexo. Ítem de Versión Chilena de Escala de Impacto de Evento –Revisada (EIE-R)

1. Cualquier recuerdo me hacía volver a sentir lo que sentí antes
2. Tenía problemas para permanecer dormido
3. Otras cosas me hacían pensar en el suceso
4. Me sentía irritable y enojado
5. Procuraba no alterarme cuando pensaba o recordaba lo sucedido
6. Pensaba en ello aún cuando no quería
7. Sentía como si no hubiese sucedido o no fuese real
8. Me mantenía lejos de cualquier cosa que me recordara lo sucedido
9. Imágenes del suceso asaltaban mi mente
10. Me sobresaltaba y asustaba fácilmente
11. Intentaba no pensar en el suceso
12. Me daba cuenta de que quedaban muchos sentimientos sin resolver
13. Mis sentimientos sobre el suceso estaban como adormecidos
14. Me encontraba como si estuviese funcionando o sintiendo como durante el evento
15. Tenía problemas para conciliar el sueño
16. Me invadían oleadas de fuertes sentimientos sobre lo sucedido
17. Intentaba apartarlo de mi memoria
18. Tenía problemas de concentración
19. Cosas que me recordaban lo sucedido me causaban reacciones fisiológicas tales como transpiración, dificultad al respirar, náuseas o taquicardia
20. Soñaba con lo sucedido
21. Me sentía vigilante y en guardia
22. Intentaba no hablar de ello

**Costo:** no tiene costo, de uso libre.

## 9. Evaluación Cognitiva de Montreal (MoCA)

El test de MoCA<sup>24</sup> es una prueba útil para detección precoz de deterioro cognitivo leve a moderado de uso libre para aplicación clínica. La detección precoz permite la derivación oportuna al especialista experto en el área que podrá así implementar medidas para detener la evolución de ese proceso o al menos demorarlo. Algunos puntos importantes a considerar para la utilización del MoCA:

- Debería ser administrado por un profesional entrenado en la utilización de la herramienta y la interpretación de pruebas cognitivas. En la página web <http://www.mocatest.org/training-certification/> se ofrecen varias opciones para perfeccionarse en su uso.
- Se puede descargar en varias versiones desde <http://www.mocatest.org/paper-tests/moca-test-full>.
- Sólo es aplicable en pacientes entre los 55 y los 85 años de edad - Los valores de corte para la interpretación del MoCA son: 18-26 deterioro cognitivo leve, 10-17: deterioro cognitivo moderado y menos de 10 deterioro cognitivo severo.

**Costo:** no tiene costo, de uso libre.

# **MONTREAL COGNITIVE ASSESSMENT (MOCA)** (EVALUACIÓN COGNITIVA MONTREAL)

**NOMBRE:**  
**Nivel de estudios:**  
**Sexo:**

**Fecha de nacimiento:**  
**FECHA:**

| VISUOESPACIAL / EJECUTIVA                                                                                                                                                                                                                                                                                                            |                         | Copiar el cubo           |                          | Dibujar un reloj (Once y diez)<br>(3 puntos)                                                      |                          | Puntos                                                               |                                            |
|--------------------------------------------------------------------------------------------------------------------------------------------------------------------------------------------------------------------------------------------------------------------------------------------------------------------------------------|-------------------------|--------------------------|--------------------------|---------------------------------------------------------------------------------------------------|--------------------------|----------------------------------------------------------------------|--------------------------------------------|
|                                                                                                                                                                                                                                                                                                                                      |                         |                          |                          | <input type="checkbox"/> Contorno <input type="checkbox"/> Números <input type="checkbox"/> Aguja |                          | ___/5                                                                |                                            |
| <b>IDENTIFICACIÓN</b>                                                                                                                                                                                                                                                                                                                |                         |                          |                          |                                                                                                   |                          |                                                                      |                                            |
|                                                                                                                                                                                                                                                                                                                                      |                         |                          |                          |                                                                                                   |                          | ___/3                                                                |                                            |
| <b>MEMORIA</b><br>Lea la lista de palabras, el paciente debe repetirlas. Haga dos intentos. Recuérdelas 5 minutos más tarde.                                                                                                                                                                                                         |                         | ROSTRO                   | SEDA                     | IGLESIA                                                                                           | CLAVEL                   | ROJO                                                                 | Sin puntos                                 |
| 1er intento                                                                                                                                                                                                                                                                                                                          |                         |                          |                          |                                                                                                   |                          |                                                                      |                                            |
| 2º intento                                                                                                                                                                                                                                                                                                                           |                         |                          |                          |                                                                                                   |                          |                                                                      |                                            |
| <b>ATENCIÓN</b><br>Lea la serie de números (1 número/seg.) El paciente debe repetirla. <input type="checkbox"/> 2 1 8 5 4<br>El paciente debe repetirla a la inversa. <input type="checkbox"/> 7 4 2                                                                                                                                 |                         | ___/2                    |                          |                                                                                                   |                          |                                                                      |                                            |
| Lea la serie de letras. El paciente debe dar un golpecito con la mano cada vez que se diga la letra A. No se asignan puntos si ≥ 2 errores.<br><input type="checkbox"/> F B A C M N A A J K L B A F A K D E A A A J A M O F A A B                                                                                                    |                         | ___/1                    |                          |                                                                                                   |                          |                                                                      |                                            |
| Restar de 7 en 7 empezando desde 100. <input type="checkbox"/> 93 <input type="checkbox"/> 86 <input type="checkbox"/> 79 <input type="checkbox"/> 72 <input type="checkbox"/> 65<br>4 o 5 sustracciones correctas: <b>3 puntos</b> , 2 o 3 correctas: <b>2 puntos</b> , 1 correcta: <b>1 punto</b> , 0 correctas: <b>0 puntos</b> . |                         | ___/3                    |                          |                                                                                                   |                          |                                                                      |                                            |
| <b>LENGUAJE</b><br>Repetir: El gato se esconde bajo el sofá cuando los perros entran en la sala. <input type="checkbox"/> Espero que él le entregue el mensaje una vez que ella se lo pida. <input type="checkbox"/>                                                                                                                 |                         | ___/2                    |                          |                                                                                                   |                          |                                                                      |                                            |
| Fluidez del lenguaje. Decir el mayor número posible de palabras que comiencen por la letra "P" en 1 min. <input type="checkbox"/> _____ (N ≥ 11 palabras)                                                                                                                                                                            |                         | ___/1                    |                          |                                                                                                   |                          |                                                                      |                                            |
| <b>ABSTRACCIÓN</b><br>Similitud entre p. ej. manzana-naranja = fruta <input type="checkbox"/> tren-bicicleta <input type="checkbox"/> reloj-regla                                                                                                                                                                                    |                         | ___/2                    |                          |                                                                                                   |                          |                                                                      |                                            |
| <b>RECUERDO DIFERIDO</b><br>Debe acordarse de las palabras SIN PISTAS                                                                                                                                                                                                                                                                |                         | ROSTRO                   | SEDA                     | IGLESIA                                                                                           | CLAVEL                   | ROJO                                                                 | Puntos por recuerdos SIN PISTAS únicamente |
|                                                                                                                                                                                                                                                                                                                                      |                         | <input type="checkbox"/> | <input type="checkbox"/> | <input type="checkbox"/>                                                                          | <input type="checkbox"/> | <input type="checkbox"/>                                             |                                            |
| Optativo                                                                                                                                                                                                                                                                                                                             | Pista de categoría      |                          |                          |                                                                                                   |                          |                                                                      |                                            |
|                                                                                                                                                                                                                                                                                                                                      | Pista elección múltiple |                          |                          |                                                                                                   |                          |                                                                      |                                            |
| <b>ORIENTACIÓN</b><br><input type="checkbox"/> Día del mes (fecha) <input type="checkbox"/> Mes <input type="checkbox"/> Año <input type="checkbox"/> Día de la semana <input type="checkbox"/> Lugar <input type="checkbox"/> Localidad                                                                                             |                         | ___/6                    |                          |                                                                                                   |                          |                                                                      |                                            |
| © Z. Nasreddine MD Versión 07 noviembre 2004<br>www.mocatest.org                                                                                                                                                                                                                                                                     |                         |                          |                          | Normal ≥ 26 / 30                                                                                  |                          | <b>TOTAL</b> ___/30<br>Añadir 1 punto si tiene ≤ 12 años de estudios |                                            |

## 10. EQ\_5D

El grupo Euroqol diseñó en 1991 el EQ-5D 3L que es la versión de 3 niveles del cuestionario EQ-5D. Está formado por dos hojas: una descriptiva que incluye los cinco dominios (movilidad, cuidado personal, actividades usuales, dolor, ansiedad/depresión) con tres niveles de opción cada uno (sin problemas, moderados problemas y severos problemas). Al paciente se le pide que indique su estado de salud en cada dominio tildando en el box que mejor lo represente de cada uno de los dominios. Las respuestas generan un número de cinco dígitos que expresa el nivel seleccionado en cada dominio (Ej: 11111 si seleccionó la opción 1 que es sin problemas en los 5 dominios. Otro ejemplo podría ser 22223, si seleccionó moderados problemas en los primeros 4 dominios y severos problemas en el último). Con ese número se puede consultar el estado de salud correspondiente a esos 5 dígitos (el índice) y compararlo con la población general.

La segunda hoja incluye una escala visual análoga (EVA) que es una línea vertical en la que el paciente traza una línea horizontal en el nivel que él considera se encuentra su estado de salud actual.

El cuestionario es autoadministrado, puede realizarse personalmente, por vía telefónica o por correo electrónico. También puede ser respondido por familiares en caso que el paciente no pueda realizarlo, aunque hay que extremar los esfuerzos para conseguir la respuesta del propio paciente.

## CUESTIONARIO DE SALUD EUROQOL-5D

Marque con una cruz la respuesta de cada apartado que mejor describa su estado de salud en el día de HOY.

### Movilidad

- No tengo problemas para caminar
- Tengo algunos problemas para caminar
- Tengo que estar en la cama

|  |
|--|
|  |
|  |
|  |

### Cuidado personal

- No tengo problemas con el cuidado personal
- Tengo algunos problemas para lavarme o vestirme
- Soy incapaz de lavarme o vestirme

|  |
|--|
|  |
|  |
|  |

**Actividades cotidianas** (p. ej., trabajar, estudiar, hacer las tareas domésticas, actividades familiares o actividades durante el tiempo libre)

- No tengo problemas para realizar mis actividades cotidianas
- Tengo algunos problemas para realizar mis actividades cotidianas
- Soy incapaz de realizar mis actividades cotidianas

|  |
|--|
|  |
|  |
|  |

### Dolor/malestar

- No tengo dolor ni malestar
- Tengo moderado dolor o malestar
- Tengo mucho dolor o malestar

|  |
|--|
|  |
|  |
|  |

### Ansiedad/depresión

- No estoy ansioso ni deprimido
- Estoy moderadamente ansioso o deprimido
- Estoy muy ansioso o deprimido

|  |
|--|
|  |
|  |
|  |

## TERMÓMETRO EUROQOL DE AUTOVALORACIÓN DEL ESTADO DE SALUD

Para ayudar a la gente a describir lo bueno o malo que es su estado de salud hemos dibujado una escala parecida a un termómetro en el cual se marca con un 100 el mejor estado de salud que pueda imaginarse y con un 0 el peor estado de salud que pueda imaginarse

Nos gustaría que nos indicara en esta escala, en su opinión, lo bueno o malo que es su estado de salud en el día de HOY. Por favor, dibuje una línea desde el casillero donde dice «Su estado de salud hoy» hasta el punto del termómetro que en su opinión indique lo bueno o malo que es su estado de salud en el día de HOY.

Su estado de salud hoy

El mejor estado de salud imaginable

100

90

80

70

60

50

40

30

20

10

0

El peor estado de salud imaginable

**Costo:** Para poder utilizar este cuestionario se debe pedir autorización al sitio que lo diseñó (<https://euroqol.org/euroqol/>) y eventualmente podría tener costo.

## 11. Malnutrition Screening Tool

Los pacientes al alta de UCI se encuentran, en general, con un mal estado nutricional por lo que se recomienda la valoración del mismo. Recientemente se ha publicado la validación del *Malnutrition Screening Tool* (MST) para su uso dentro de programas de rehabilitación<sup>25</sup>. Esta herramienta, tiene en cuenta la pérdida de peso y su causa, se puntea y se clasifica en pacientes con riesgo nutricional o sin riesgo. Aquellos que presenten un valor  $\geq 2$  deben ser derivados al especialista para su seguimiento. A su vez, la administración de la alimentación por vía nasogástrica o por ostomía es indicación de seguimiento por equipo de nutrición. La MST es una herramienta sencilla de utilizar por cualquier miembro del equipo multidisciplinario, con una sensibilidad del 72,2% y una especificidad del 83,8% comparada con la Valoración Global Subjetiva.

**Costo:** no tiene costo, de uso libre.

| Preguntas                                                            | Puntaje |
|----------------------------------------------------------------------|---------|
| 1. ¿Ha perdido peso de manera involuntaria recientemente?            |         |
| No                                                                   | 0       |
| No estoy seguro                                                      | 2       |
| Si ha perdido peso ¿cuántos kilogramos?                              |         |
| 1-5 kg                                                               | 1       |
| 6-10 kg                                                              | 2       |
| 11-15 kg                                                             | 3       |
| > 15 kg                                                              | 4       |
| No estoy seguro                                                      | 0       |
| 2. ¿Ha comido menos de lo normal a causa de disminución del apetito? |         |
| No                                                                   | 0       |
| Sí                                                                   | 1       |

MST = 0 o 1 sin riesgo. MST  $\geq 2$  en riesgo de desnutrición.

## 12. Manual de Rehabilitación

Diríjase a la página <https://www.sati.org.ar/index.php/areas-o/comites-o/comite-de-seguimiento-y-rehabilitacion-o/comite-de-seguimiento-y-rehabilitacion-produccion-academica>

**Costo:** sin costo, de uso libre.

## Bibliografía

---

- <sup>1</sup> Kenneth Rockwood, Xiaowei Song, Chris MacKnight, Howard Bergman, David B. Hogan, Ian McDowell, Arnold Mitnitski. A global clinical measure of fitness and frailty in elderly people. *CMAJ* Aug 2005;173:489-495.
- <sup>2</sup> Muscedere J, Waters B, Varambally A, et al. The impact of frailty on intensive care unit outcomes: a systematic review and meta-analysis. *Intensive Care Medicine*. 2017;43:1105-1122.
- <sup>3</sup> Holland AE, Spruit MA, Troosters T, et al. An official European Respiratory Society/American Thoracic Society technical standard: field walking tests in chronic respiratory disease. *Eur Respir J* 2014;44:1428-1446.
- <sup>4</sup> Gochicoa-Rangel L, Mora-Romero U, Guerrero-Zúñiga S, Silva-Cerón M, Cid-Juárez S, Velázquez-Uncal M, Durán-Cuéllar A, Salas-Escamilla I, Mejía-Alfaro R, Torre-Bouscoulet L - Prueba de caminata de 6 minutos: recomendaciones y procedimientos. *Neumol Cir Torax* 2015;74:127-136.
- <sup>5</sup> Singh SJ, Puhan MA, Andrianopoulos V, et al. An official systematic review of the European Respiratory Society/American Thoracic Society: measurement properties of field walking tests in chronic respiratory disease. *Eur Respir J* 2014;44:1447-1478.
- <sup>6</sup> Muñoz Silva C. A., Rojas Orellana P. A., Marzuca Nassr G. - Functional status evaluation of older adults with moderate and severe unit belonging to a family health center. *Fisioter. Pesqui.* 2015;22:1.
- <sup>7</sup> Trigás-Ferrín M., Ferreira-González L., Meijide-Míguez H. - Scales for the functional assessment in the elderly. *Galicia Clin* 2011;72:11-16.
- <sup>8</sup> Cabañero-Martínez MJ., Cabrero-García J., Martínez MR., Muñoz-Mendoza CL. Revisión estructurada de las medidas de actividades de la vida diaria en personas mayores. *Rev Esp Geriatr Gerontol.* 2008;43:271-83.
- <sup>9</sup> Podsiadlo D, Richardson S. The Time "Up & Go": A Test of Basic Functional Mobility for Frail Elderly Persons. *Journal of American Geriatrics Society* 1991; 39: 142-148.
- <sup>10</sup> Shumway Cook A, Brauer S, Woollacott M. Predicting the Probability for Falls in Community Dwelling Older Adults Using the Timed Up & Go Test. *Physical Therapy* 2000; 80: 896-903.
- <sup>11</sup> Lusardi MM, Pellecchia GL, Schulman M. Functional Performance in Community Living Older Adults. *Journal of Geriatric Physical Therapy* 2003;26: 14-22.
- <sup>12</sup> Hamilton, M. Rating scale for depression. *J.Neurol Neurosurg Psychiatry* 1960;23:56-62.
- <sup>13</sup> Conde. V, Franch .J.L.(1984). Escalas de evaluación comportamental para la cuantificación de la sintomatología de los trastornos angustiosos y depresivos.

- 
- <sup>14</sup> Upjohn SA, Ramos-Brieva JA, Cordero A. Validación de la versión castellana de la escala de Hamilton para la depresión. *Actas Luso-Esp Neurol Psiquiatr* 1986;14:324-334.
- <sup>15</sup> Ramos-Brieva JA, Cordero A. A New validation of the Hamilton Rating Scale for Depression. *J. Psychiatr Res* 1988;22:21-28.
- <sup>16</sup> Brenlla, M. E., & Rodríguez, C. M. (2006). Adaptación argentina del Inventario de Depresión de Beck (BDI-II). *BDI-II. Inventario de depresión de Beck*, 11-37.
- <sup>17</sup> Magán, I., Sanz, J., & García-Vera, M. P. Psychometric properties of a Spanish version of the Beck Anxiety Inventory (BAI) in general population. *The Spanish journal of psychology* 2008;11:626-640.
- <sup>18</sup> Sanz J., & Navarro M. E. (2003). Propiedades psicométricas de una versión española del Inventario de Ansiedad de Beck (BAI) en estudiantes universitarios. *Ansiedad y Estrés*, 9, 59–84. Google Scholar
- <sup>19</sup> Sanz, J., García-Vera, M. P., & Fortún, M. El "Inventario de ansiedad de Beck" (BAI): propiedades psicométricas de la versión española en pacientes con trastornos psicológicos. *Psicología Conductual* 2012;20:563.
- <sup>20</sup> Horowitz M, Wilner N, Alvarez W. Impact of Event Scale: A Measure of Subjective Stress. *Psychosomatic Medicine* 1979;41:3.
- <sup>21</sup> Weiss D. The impact of event scale-revised. Wilson J & Keane T. Editores. *Assessing psychological trauma and PTSD*. New York, NY: Guilford Press; 2004:168-89.
- <sup>22</sup> Creamer M, Bell, R, Falilla, S. Psychometric properties of the Impact of Event Scale-Revised. *Behaviour Research and Therapy* 2002;41:1489-1496.
- <sup>23</sup> Caamaño L, Fuentes D, González L. Adaptación y validación de la versión chilena de la escala de impacto de evento-revisada (EIE-R). *Rev Med Chile* 2011;139:1163-1168.
- <sup>24</sup> <http://www.mocatest.org>
- <sup>25</sup> Leipold CE, Bertino SB, L'Huillier HM, et al. Validation of the Malnutrition Screening Tool for use in a Community Rehabilitation Program. *Nutr Diet*. 2018;75:117-122.
